# Supplementary material for: C9orf72 deficiency promotes motor deficits of a C9ALS/FTD mouse model in a dose-dependent manner
Source: Springer Nature journal article supplement (doi:10.1186/s40478-019-0685-7), 2019-03-04

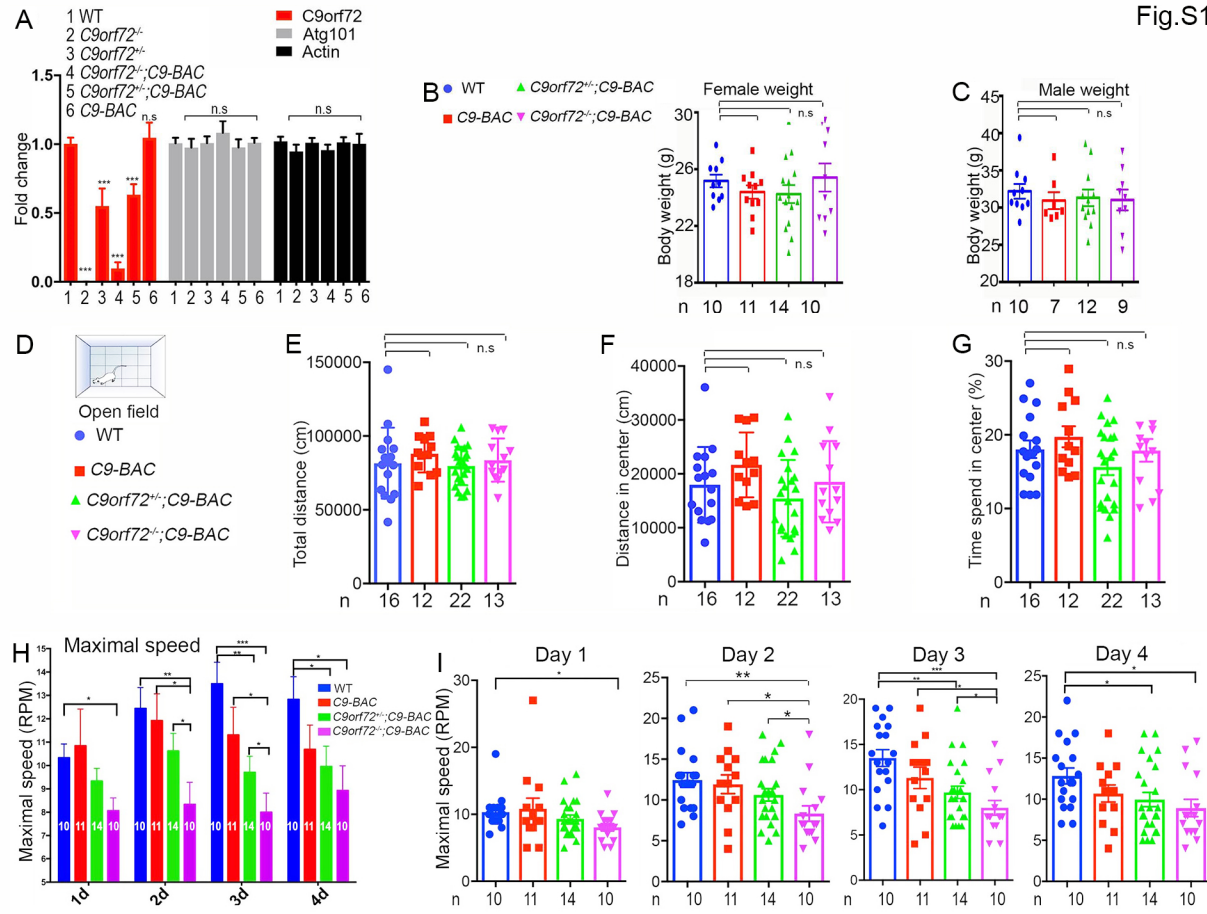

Supplement: MOESM1 [file 25666688]
